# Supplementary material
Source: publisher figshare collection journal article supplement (https://gsapubs.figshare.com/articles/dataset/_/12541511)
Supplement: Supplementary file 1 [file 1]

## Sheet: Sheet1
Table S2. Summary of AFT length data, Imperial Formation, Mackenzie Plain, NWT, Canada
	Confined	angle to			meas.	meas.	calc.
A2Z Sample	length	C-axis	Etch	Dpar	F	Cl	OH	rmr0
No.	(mm)	(degrees)	Figs.	(µm)	(apfu)	(apfu)	(apfu)
JPCPC3, Imperial Fm. (siltstone) Powell River section, ~0.70 %Ro, 65.277 N, 128.774 W
Kinetic population #1 (rmr0 > 0.76)
P1420_003_Ap_A_2_POS_40	13.2	45.2	2	2.68	1.9842	0.0066	0.0092	0.8655
P1420_003_Ap_A_2_POS_40	12.9	66.77	2	2.68	1.9842	0.0066	0.0092	0.8655
P1420_003_Ap_A_2_POS_48	13.24	39.08	4	2.5	2.09	0	0	0.8616
P1420_003_Ap_A_2_POS_48	12.76	65.83	4	2.5	2.09	0	0	0.8616
P1420_003_Ap_A_2_POS_27	14.53	57.21	3	2.25	1.9833	0.0099	0.0069	0.8589
P1420_003_Ap_A_2_POS_27	14.62	55.33	3	2.25	1.9833	0.0099	0.0069	0.8589
P1420_003_Ap_A_2_POS_27	11.05	51.98	3	2.25	1.9833	0.0099	0.0069	0.8589
P1420_003_Ap_A_2_POS_41	12.17	51.05	2	2.44	1.8268	0.0102	0.163	0.851
P1420_003_Ap_A_2_POS_41	12.95	57.7	2	2.44	1.8268	0.0102	0.163	0.851
P1420_003_Ap_A_2_POS_41	12.57	81.05	2	2.44	1.8268	0.0102	0.163	0.851
P1420_003_Ap_A_2_POS_23	11.49	59.92	2	2.6	1.8061	0.0293	0.1646	0.8478
P1420_003_Ap_A_2_POS_23	2.14	27.06	2	2.6	1.8061	0.0293	0.1646	0.8478
P1420_003_Ap_A_2_POS_33	14.6	49.24	3	2.38	2.0795	0.03	0	0.8476
P1420_003_Ap_A_2_POS_44	14.84	24.2	2	2.62	1.8109	0.0099	0.1791	0.8467
P1420_003_Ap_A_2_POS_44	15.29	63.26	2	2.62	1.8109	0.0099	0.1791	0.8467
P1420_003_Ap_A_2_POS_44	16.02	31.37	2	2.62	1.8109	0.0099	0.1791	0.8467
P1420_003_Ap_A_2_POS_45	11.04	55.12	4	2.53	1.7185	0.0116	0.2699	0.8462
P1420_003_Ap_A_2_POS_45	11.98	82.05	4	2.53	1.7185	0.0116	0.2699	0.8462
P1420_003_Ap_A_2_POS_45	13.02	47.78	4	2.53	1.7185	0.0116	0.2699	0.8462
P1420_003_Ap_A_2_POS_45	16.11	66.41	4	2.53	1.7185	0.0116	0.2699	0.8462
P1420_003_Ap_A_2_POS_45	13.56	75.22	4	2.53	1.7185	0.0116	0.2699	0.8462
P1420_003_Ap_A_2_POS_37	10.79	58.65	4	2.9	1.6623	0.0116	0.3261	0.8443
P1420_003_Ap_A_2_POS_37	12.53	79.73	4	2.9	1.6623	0.0116	0.3261	0.8443
P1420_003_Ap_A_2_POS_37	11.7	72.66	4	2.9	1.6623	0.0116	0.3261	0.8443
P1420_003_Ap_A_2_POS_1	14.14	70.09	4	2.22	1.6213	0.015	0.3637	0.8436
P1420_003_Ap_A_2_POS_19	13.26	37.56	3	2.37	1.5745	0.0015	0.424	0.8415
P1420_003_Ap_A_2_POS_19	13.6	51.81	3	2.37	1.5745	0.0015	0.424	0.8415
P1420_003_Ap_A_2_POS_19	12.1	79.7	3	2.37	1.5745	0.0015	0.424	0.8415
P1420_003_Ap_A_2_POS_58	14.97	26.6	3	2.35	1.6109	0.0247	0.3644	0.8385
P1420_003_Ap_A_2_POS_13	15.04	30.28	3	2.5	1.5873	0.0209	0.3918	0.8378
P1420_003_Ap_A_2_POS_13	11	60.85	3	2.5	1.5873	0.0209	0.3918	0.8378
P1420_003_Ap_A_2_POS_13	11.24	58.46	3	2.5	1.5873	0.0209	0.3918	0.8378
P1420_003_Ap_A_2_POS_30	13.92	56.69	4	3.07	1.5835	0.0286	0.3879	0.8352
P1420_003_Ap_A_2_POS_30	12.13	67.98	4	3.07	1.5835	0.0286	0.3879	0.8352
P1420_003_Ap_A_2_POS_30	15.3	80.97	4	3.07	1.5835	0.0286	0.3879	0.8352
P1420_003_Ap_A_2_POS_30	13.13	78.28	4	3.07	1.5835	0.0286	0.3879	0.8352
P1420_003_Ap_A_2_POS_30	14.02	56.52	4	3.07	1.5835	0.0286	0.3879	0.8352
P1420_003_Ap_A_2_POS_30	13.55	54.69	4	3.07	1.5835	0.0286	0.3879	0.8352
P1420_003_Ap_A_2_POS_30	15.2	42.64	4	3.07	1.5835	0.0286	0.3879	0.8352
P1420_003_Ap_A_2_POS_51	11.8	65.39	4	2.66	1.5061	0.0325	0.4614	0.8331
P1420_003_Ap_A_2_POS_51	11.94	73.12	4	2.66	1.5061	0.0325	0.4614	0.8331
P1420_003_Ap_A_2_POS_51	14.52	77.9	4	2.66	1.5061	0.0325	0.4614	0.8331
P1420_003_Ap_A_2_POS_51	14.42	56.96	4	2.66	1.5061	0.0325	0.4614	0.8331
P1420_003_Ap_A_2_POS_8	13.19	78.45	4	2.46	1.7175	0.058	0.2245	0.8292
P1420_003_Ap_A_2_POS_8	13.54	88.95	4	2.46	1.7175	0.058	0.2245	0.8292
P1420_003_Ap_A_2_POS_8	12.53	39.01	4	2.46	1.7175	0.058	0.2245	0.8292
P1420_003_Ap_A_2_POS_62	13.73	64.1	2	2.73	1.498	0.0581	0.4439	0.8271
P1420_003_Ap_A_2_POS_21	13.44	64.95	3	2.75	1.8888	0.0925	0.0187	0.8246
P1420_003_Ap_A_2_POS_21	14.95	39.01	3	2.75	1.8888	0.0925	0.0187	0.8246
P1420_003_Ap_A_2_POS_22	15.94	30.85	1	2.91	1.3305	0.0977	0.5717	0.8243
P1420_003_Ap_A_2_POS_22	11.15	69.54	1	2.91	1.3305	0.0977	0.5717	0.8243
P1420_003_Ap_A_2_POS_56	12.13	76.56	4	2.44	1.7162	0.0488	0.235	0.8235
P1420_003_Ap_A_2_POS_56	12.12	47.03	4	2.44	1.7162	0.0488	0.235	0.8235
P1420_003_Ap_A_2_POS_25	14.47	55.16	4	2.6	1.6318	0.0766	0.2917	0.823
P1420_003_Ap_A_2_POS_25	12.87	86.62	4	2.6	1.6318	0.0766	0.2917	0.823
P1420_003_Ap_A_2_POS_46	13.03	69.61	4	2.51	1.721	0.0718	0.2072	0.8173
P1420_003_Ap_A_2_POS_46	16.39	12.33	4	2.51	1.721	0.0718	0.2072	0.8173
P1420_003_Ap_A_2_POS_46	11.12	86.09	4	2.51	1.721	0.0718	0.2072	0.8173
P1420_003_Ap_A_2_POS_7	15.28	13.38	2	2.68	1.7333	0.0218	0.2449	0.8145
P1420_003_Ap_A_2_POS_59	12.51	74.33	4	2.72	1.4304	0.098	0.4716	0.8135
P1420_003_Ap_A_2_POS_64	14.1	59.64	4	2.34	2.0185	0.1285	0	0.8012
P1420_003_Ap_A_2_POS_61	14.8	65.78	2	1.88	0.9581	0.0054	1.0365	0.8007
P1420_003_Ap_A_2_POS_14	15.2	31.21	4	2.85	0.961	0.0751	0.9639	0.8002
P1420_003_Ap_A_2_POS_14	15.94	28.13	4	2.85	0.961	0.0751	0.9639	0.8002
P1420_003_Ap_A_2_POS_14	14.24	55.33	4	2.85	0.961	0.0751	0.9639	0.8002
P1420_003_Ap_A_2_POS_14	14.56	37.05	4	2.85	0.961	0.0751	0.9639	0.8002
P1420_003_Ap_A_2_POS_14	14.93	21.37	4	2.85	0.961	0.0751	0.9639	0.8002
P1420_003_Ap_A_2_POS_14	14.82	34.16	4	2.85	0.961	0.0751	0.9639	0.8002
P1420_003_Ap_A_2_POS_14	14.18	24.68	4	2.85	0.961	0.0751	0.9639	0.8002
P1420_003_Ap_A_2_POS_14	12.15	59.74	4	2.85	0.961	0.0751	0.9639	0.8002
P1420_003_Ap_A_2_POS_14	13.97	38.1	4	2.85	0.961	0.0751	0.9639	0.8002
P1420_003_Ap_A_2_POS_14	16.22	22.71	4	2.85	0.961	0.0751	0.9639	0.8002
P1420_003_Ap_A_2_POS_52	15.03	31.25	4	2.68	2.0743	0.0342	0	0.799
P1420_003_Ap_A_2_POS_52	12.95	80.33	4	2.68	2.0743	0.0342	0	0.799
P1420_003_Ap_A_2_POS_36	13.09	47.22	2	2.17	1.6585	0.1752	0.1663	0.7988
P1420_003_Ap_A_2_POS_36	13.68	63.82	2	2.17	1.6585	0.1752	0.1663	0.7988
P1420_003_Ap_A_2_POS_65	14.66	68.77	3	1.86	0.9584	0.0054	1.0362	0.7978
P1420_003_Ap_A_2_POS_5	14.52	81.03	4	3.32	0.9599	0.075	0.965	0.7917
P1420_003_Ap_A_2_POS_42	13.16	52.6	3	2.71	1.235	0.2319	0.533	0.79
P1420_003_Ap_A_2_POS_42	13.1	61.07	3	2.71	1.235	0.2319	0.533	0.79
P1420_003_Ap_A_2_POS_42	13.89	74.89	3	2.71	1.235	0.2319	0.533	0.79
P1420_003_Ap_A_2_POS_42	13.48	51.41	3	2.71	1.235	0.2319	0.533	0.79
P1420_003_Ap_A_2_POS_42	13.69	78.24	3	2.71	1.235	0.2319	0.533	0.79
P1420_003_Ap_A_2_POS_49	14.85	43.14	3	2.97	1.1614	0.1607	0.6779	0.7884
P1420_003_Ap_A_2_POS_49	13.85	42.37	3	2.97	1.1614	0.1607	0.6779	0.7884
P1420_003_Ap_A_2_POS_50	13.33	79.66	3	2.89	1.2381	0.1616	0.6003	0.7852
P1420_003_Ap_A_2_POS_57	12.51	57.01	4	2.68	1.2282	0.198	0.5738	0.7791
P1420_003_Ap_A_2_POS_57	13.78	54.47	4	2.68	1.2282	0.198	0.5738	0.7791
P1420_003_Ap_A_2_POS_26	12.39	48.69	4	3.63	1.384	0.2186	0.3974	0.7772
P1420_003_Ap_A_2_POS_63	15.34	51.44	4	2.61	1.3728	0.1965	0.4307	0.7729
P1420_003_Ap_A_2_POS_63	13.36	59.82	4	2.61	1.3728	0.1965	0.4307	0.7729
P1420_003_Ap_A_2_POS_63	14.05	73.7	4	2.61	1.3728	0.1965	0.4307	0.7729
P1420_003_Ap_A_2_POS_34	13.2	60.76	2	3.13	1.0052	0.1607	0.8341	0.7681
P1420_003_Ap_A_2_POS_28	14.48	72.13	4	3.09	1.4237	0.1472	0.4291	0.7638
P1420_003_Ap_A_2_POS_28	12.82	58	4	3.09	1.4237	0.1472	0.4291	0.7638
P1420_003_Ap_A_2_POS_28	13.36	80.77	4	3.09	1.4237	0.1472	0.4291	0.7638
P1420_003_Ap_A_2_POS_28	13.78	43.41	4	3.09	1.4237	0.1472	0.4291	0.7638
P1420_003_Ap_A_2_POS_2	11.37	41.12	4	3.25	1.2012	0.2318	0.567	0.7613
P1420_003_Ap_A_2_POS_3	14.23	59.64	4	2.58	1.4259	0.0973	0.4769	0.7586
P1420_003_Ap_A_2_POS_39	17.87	35.17	2	3.22	1.1124	0.2061	0.6815	0.7355
P1420_003_Ap_A_2_POS_10	13.85	76.96	4	3.53	0.9945	0.1562	0.8493	0.7132
P1420_003_Ap_A_2_POS_10	16.91	47.19	4	3.53	0.9945	0.1562	0.8493	0.7132
P1420_003_Ap_A_2_POS_10	13.14	56.31	4	3.53	0.9945	0.1562	0.8493	0.7132
P1420_003_Ap_A_2_POS_10	15.92	67.93	4	3.53	0.9945	0.1562	0.8493	0.7132
Ave	13.5531			2.71567	1.50292	0.0775038	0.425857	0.81348
SD	1.81781			0.333492	0.333037	0.0717708	0.291403	0.0353737
Kinetic population #2 (rmr0 < 0.76)
P1420_003_Ap_A_2_POS_18	14.89	64.11	4	2.7	1.3388	0.0889	0.5723	0.7496
P1420_003_Ap_A_2_POS_18	13.68	71.97	4	2.7	1.3388	0.0889	0.5723	0.7496
P1420_003_Ap_A_2_POS_11	15.1	55.54	4	3.23	0.8027	0.1732	1.0241	0.7475
P1420_003_Ap_A_2_POS_11	13.63	50.63	4	3.23	0.8027	0.1732	1.0241	0.7475
P1420_003_Ap_A_2_POS_11	13.6	65.21	4	3.23	0.8027	0.1732	1.0241	0.7475
P1420_003_Ap_A_2_POS_11	11.46	50.2	4	3.23	0.8027	0.1732	1.0241	0.7475
P1420_003_Ap_A_2_POS_9	14.88	49.91	3	3.15	1.3396	0.243	0.4174	0.7387
P1420_003_Ap_A_2_POS_9	13.32	50.54	3	3.15	1.3396	0.243	0.4174	0.7387
P1420_003_Ap_A_2_POS_43	17.53	15.81	3	3.91	1.0201	0.1852	0.7946	0.7262
P1420_003_Ap_A_2_POS_43	13.41	56.02	3	3.91	1.0201	0.1852	0.7946	0.7262
P1420_003_Ap_A_2_POS_54	15.16	38.81	4	3.67	0.834	0.1822	0.9838	0.7153
P1420_003_Ap_A_2_POS_17	15.51	41.04	1	4	1.2257	0.4993	0.2749	0.7034
P1420_003_Ap_A_2_POS_17	15.87	75.71	1	4	1.2257	0.4993	0.2749	0.7034
P1420_003_Ap_A_2_POS_31	16.02	31.62	2	4.17	0.973	0.3242	0.7028	0.6688
P1420_003_Ap_A_2_POS_29	13.46	49.98	2	3.92	1.0502	0.3473	0.6025	0.6392
P1420_003_Ap_A_2_POS_29	14.34	58.04	2	3.92	1.0502	0.3473	0.6025	0.6392
P1420_003_Ap_A_2_POS_29	7.5	81.29	2	3.92	1.0502	0.3473	0.6025	0.6392
Ave	14.08			3.53176	1.05981	0.251406	0.688759	0.713382
SD	2.18875			0.477143	0.208215	0.124189	0.262052	0.0415253
JPCPC4, Imperial Fm. (siltstone) Imperial River section, ~0.66 %Ro, 65.116 N, 127.859 W
Kinetic population #1 (rmr0 > 0.82)
P1420_004_Ap_A_2_POS_6	14.57	50.65	1	2.05	1.9854	0.0505	0	0.8585
P1420_004_Ap_A_2_POS_6	14.89	51.21	1	2.05	1.9854	0.0505	0	0.8585
P1420_004_Ap_A_2_POS_43	12.94	52.12	2	2.56	1.9204	0.0029	0.0767	0.8567
P1420_004_Ap_A_2_POS_43	10	71.22	2	2.56	1.9204	0.0029	0.0767	0.8567
P1420_004_Ap_A_2_POS_43	11.1	58.74	2	2.56	1.9204	0.0029	0.0767	0.8567
P1420_004_Ap_A_2_POS_21	12.12	56.09	4	2.17	1.8472	0.0076	0.1453	0.8517
P1420_004_Ap_A_2_POS_4	13.52	70.02	4	2.73	2.0642	0.012	0	0.8487
P1420_004_Ap_A_2_POS_4	16.33	40.44	4	2.73	2.0642	0.012	0	0.8487
P1420_004_Ap_A_2_POS_4	14.37	36.17	4	2.73	2.0642	0.012	0	0.8487
P1420_004_Ap_A_2_POS_39	15.09	52.42	2	2.82	1.7089	0.014	0.2771	0.8458
P1420_004_Ap_A_2_POS_39	14.77	30.06	2	2.82	1.7089	0.014	0.2771	0.8458
P1420_004_Ap_A_2_POS_39	14.52	17.55	2	2.82	1.7089	0.014	0.2771	0.8458
P1420_004_Ap_A_2_POS_51	15.03	70.88	4	3.25	2.0164	0.0295	0	0.844
P1420_004_Ap_A_2_POS_51	15.33	40.73	4	3.25	2.0164	0.0295	0	0.844
P1420_004_Ap_A_2_POS_41	16.59	54.09	2	2.66	1.7886	0.0379	0.1735	0.8432
P1420_004_Ap_A_2_POS_41	13.05	52.54	2	2.66	1.7886	0.0379	0.1735	0.8432
P1420_004_Ap_A_2_POS_41	14.07	41.8	2	2.66	1.7886	0.0379	0.1735	0.8432
P1420_004_Ap_A_2_POS_41	16.47	21.63	2	2.66	1.7886	0.0379	0.1735	0.8432
P1420_004_Ap_A_2_POS_35	13.81	70.35	3	2.77	1.7188	0.0078	0.2733	0.8406
P1420_004_Ap_A_2_POS_35	13.4	54.71	3	2.77	1.7188	0.0078	0.2733	0.8406
P1420_004_Ap_A_2_POS_35	14.52	41.37	3	2.77	1.7188	0.0078	0.2733	0.8406
P1420_004_Ap_A_2_POS_35	13.08	30.9	3	2.77	1.7188	0.0078	0.2733	0.8406
P1420_004_Ap_A_2_POS_24	15.43	60.84	3	2.47	1.5078	0.0261	0.4661	0.8386
P1420_004_Ap_A_2_POS_24	11.49	56.01	3	2.47	1.5078	0.0261	0.4661	0.8386
P1420_004_Ap_A_2_POS_24	12.18	65.35	3	2.47	1.5078	0.0261	0.4661	0.8386
P1420_004_Ap_A_2_POS_24	15.53	58.63	3	2.47	1.5078	0.0261	0.4661	0.8386
P1420_004_Ap_A_2_POS_46	14	74.34	0	2.58	2.0966	0.0139	0	0.8373
P1420_004_Ap_A_2_POS_46	14.71	46.68	0	2.58	2.0966	0.0139	0	0.8373
P1420_004_Ap_A_2_POS_46	15.03	8.89	0	2.58	2.0966	0.0139	0	0.8373
P1420_004_Ap_A_2_POS_46	14.74	73.58	0	2.58	2.0966	0.0139	0	0.8373
P1420_004_Ap_A_2_POS_46	14.64	71.72	0	2.58	2.0966	0.0139	0	0.8373
P1420_004_Ap_A_2_POS_46	11.3	79.79	0	2.58	2.0966	0.0139	0	0.8373
P1420_004_Ap_A_2_POS_46	14.31	49.64	0	2.58	2.0966	0.0139	0	0.8373
P1420_004_Ap_A_2_POS_45	9.63	50.95	2	2.58	2.0969	0.0139	0	0.8367
P1420_004_Ap_A_2_POS_12	15.42	34.75	2	2.74	1.8599	0.0021	0.138	0.8313
P1420_004_Ap_A_2_POS_12	14.87	45.61	2	2.74	1.8599	0.0021	0.138	0.8313
P1420_004_Ap_A_2_POS_12	12.16	69.41	2	2.74	1.8599	0.0021	0.138	0.8313
P1420_004_Ap_A_2_POS_12	15.1	32.78	2	2.74	1.8599	0.0021	0.138	0.8313
P1420_004_Ap_A_2_POS_12	13.43	78.62	2	2.74	1.8599	0.0021	0.138	0.8313
P1420_004_Ap_A_2_POS_12	15.6	21.12	2	2.74	1.8599	0.0021	0.138	0.8313
P1420_004_Ap_A_2_POS_38	14.74	62.37	1	1.9	2.1408	0	0	0.8307
P1420_004_Ap_A_2_POS_38	13.77	40.19	1	1.9	2.1408	0	0	0.8307
P1420_004_Ap_A_2_POS_14	14.92	53.96	4	2.43	1.6391	0.0378	0.3231	0.8305
P1420_004_Ap_A_2_POS_14	13.99	36.48	4	2.43	1.6391	0.0378	0.3231	0.8305
P1420_004_Ap_A_2_POS_14	13.87	66.02	4	2.43	1.6391	0.0378	0.3231	0.8305
P1420_004_Ap_A_2_POS_14	13.7	29.78	4	2.43	1.6391	0.0378	0.3231	0.8305
P1420_004_Ap_A_2_POS_14	13.83	57.16	4	2.43	1.6391	0.0378	0.3231	0.8305
P1420_004_Ap_A_2_POS_14	14.49	34.95	4	2.43	1.6391	0.0378	0.3231	0.8305
P1420_004_Ap_A_2_POS_49	15.07	62.02	3	2.22	1.7701	0.0784	0.1515	0.8294
P1420_004_Ap_A_2_POS_34	14.98	51.77	4	3.2	1.307	0.0138	0.6792	0.8251
P1420_004_Ap_A_2_POS_34	12.72	53.89	4	3.2	1.307	0.0138	0.6792	0.8251
P1420_004_Ap_A_2_POS_1	14.7	60.29	3	2.99	2.1706	0.0297	0	0.8236
P1420_004_Ap_A_2_POS_1	13.8	67.59	3	2.99	2.1706	0.0297	0	0.8236
P1420_004_Ap_A_2_POS_3	12.61	70.82	2	2.23	1.3402	0.0111	0.6487	0.7362
P1420_004_Ap_A_2_POS_3	12.3	55.15	2	2.23	1.3402	0.0111	0.6487	0.7362
P1420_004_Ap_A_2_POS_3	11.61	57.45	2	2.23	1.3402	0.0111	0.6487	0.7362
P1420_004_Ap_A_2_POS_3	13.55	80.79	2	2.23	1.3402	0.0111	0.6487	0.7362
P1420_004_Ap_A_2_POS_3	13.35	51	2	2.23	1.3402	0.0111	0.6487	0.7362
P1420_004_Ap_A_2_POS_3	14.05	48.33	2	2.23	1.3402	0.0111	0.6487	0.7362
Ave	13.9185			2.57864	1.79334	0.0190525	0.220797	0.828371
SD	1.47517			0.301447	0.261016	0.015766	0.2233	0.0324466
Kinetic population #2 (0.76 < rmr0 < 0.82)
P1420_004_Ap_A_2_POS_13	15.9	39.28	2	2.5	1.9355	0	0.0645	0.8571
P1420_004_Ap_A_2_POS_23	14.37	78.39	2	2.72	1.7715	0.0603	0.1683	0.8496
P1420_004_Ap_A_2_POS_23	15.29	39.39	2	2.72	1.7715	0.0603	0.1683	0.8496
P1420_004_Ap_A_2_POS_15	8.66	49.29	2	3.11	1.5814	0.0147	0.4039	0.822
P1420_004_Ap_A_2_POS_15	10.83	43.44	2	3.11	1.5814	0.0147	0.4039	0.822
P1420_004_Ap_A_2_POS_15	13.58	51.95	2	3.11	1.5814	0.0147	0.4039	0.822
P1420_004_Ap_A_2_POS_48	14.73	76.44	2	2.16	1.4081	0.0681	0.5238	0.8187
P1420_004_Ap_A_2_POS_48	13.02	56.66	2	2.16	1.4081	0.0681	0.5238	0.8187
P1420_004_Ap_A_2_POS_48	14.92	52.97	2	2.16	1.4081	0.0681	0.5238	0.8187
P1420_004_Ap_A_2_POS_48	14.95	72.25	2	2.16	1.4081	0.0681	0.5238	0.8187
P1420_004_Ap_A_2_POS_48	9.48	81.89	2	2.16	1.4081	0.0681	0.5238	0.8187
P1420_004_Ap_A_2_POS_48	14.55	27.63	2	2.16	1.4081	0.0681	0.5238	0.8187
P1420_004_Ap_A_2_POS_2	14.47	71.75	2	2.78	1.2184	0.0216	0.76	0.8184
P1420_004_Ap_A_2_POS_2	12.03	62.26	2	2.78	1.2184	0.0216	0.76	0.8184
P1420_004_Ap_A_2_POS_2	13.67	55.11	2	2.78	1.2184	0.0216	0.76	0.8184
P1420_004_Ap_A_2_POS_26	12.85	60.12	3	2.73	1.0804	0.0599	0.8597	0.8178
P1420_004_Ap_A_2_POS_26	12.22	75.66	3	2.73	1.0804	0.0599	0.8597	0.8178
P1420_004_Ap_A_2_POS_26	13.4	58.12	3	2.73	1.0804	0.0599	0.8597	0.8178
P1420_004_Ap_A_2_POS_26	13.96	43.39	3	2.73	1.0804	0.0599	0.8597	0.8178
P1420_004_Ap_A_2_POS_0	15	29.77	2	2.97	2.0357	0.0817	0	0.8094
P1420_004_Ap_A_2_POS_0	14.7	38.93	2	2.97	2.0357	0.0817	0	0.8094
P1420_004_Ap_A_2_POS_42	12.27	62.91	4	3.22	1.5059	0.0602	0.4339	0.8086
P1420_004_Ap_A_2_POS_42	12.75	57.08	4	3.22	1.5059	0.0602	0.4339	0.8086
P1420_004_Ap_A_2_POS_42	10.46	76.24	4	3.22	1.5059	0.0602	0.4339	0.8086
P1420_004_Ap_A_2_POS_42	15.29	36.65	4	3.22	1.5059	0.0602	0.4339	0.8086
P1420_004_Ap_A_2_POS_5	12.7	55.43	2	2.34	2.0105	0.1139	0	0.8015
P1420_004_Ap_A_2_POS_44	15.97	68.02	1	2.94	1.354	0.1855	0.4605	0.7893
P1420_004_Ap_A_2_POS_44	14.69	58.64	1	2.94	1.354	0.1855	0.4605	0.7893
P1420_004_Ap_A_2_POS_44	12.64	48.73	1	2.94	1.354	0.1855	0.4605	0.7893
P1420_004_Ap_A_2_POS_44	7.97	57.84	1	2.94	1.354	0.1855	0.4605	0.7893
P1420_004_Ap_A_2_POS_17	9.14	49.27	4	3.27	1.5846	0.0561	0.3593	0.7877
P1420_004_Ap_A_2_POS_17	13.99	64.3	4	3.27	1.5846	0.0561	0.3593	0.7877
P1420_004_Ap_A_2_POS_17	11.85	70.27	4	3.27	1.5846	0.0561	0.3593	0.7877
P1420_004_Ap_A_2_POS_31	15.89	44.37	1	3.07	1.6219	0.0869	0.2912	0.7753
P1420_004_Ap_A_2_POS_31	12.58	77.3	1	3.07	1.6219	0.0869	0.2912	0.7753
P1420_004_Ap_A_2_POS_19	15.79	86.87	3	3.6	1.2329	0.1746	0.5925	0.7663
P1420_004_Ap_A_2_POS_19	16.4	43.66	3	3.6	1.2329	0.1746	0.5925	0.7663
P1420_004_Ap_A_2_POS_19	13.28	76.58	3	3.6	1.2329	0.1746	0.5925	0.7663
P1420_004_Ap_A_2_POS_19	13.46	54	3	3.6	1.2329	0.1746	0.5925	0.7663
Ave	13.3256			2.89128	1.46407	0.0814949	0.463649	0.806454
SD	2.09986			0.428167	0.25935	0.0555897	0.233066	0.0226757
Kinetic population #3 (rmr0 < 0.76)
P1420_004_Ap_A_2_POS_16	14.17	59.78	4	2.35	1.4425	0.0809	0.4766	0.7772
P1420_004_Ap_A_2_POS_16	13.92	22.44	4	2.35	1.4425	0.0809	0.4766	0.7772
P1420_004_Ap_A_2_POS_7	12.88	81.75	2	3.06	0.6051	0.1937	1.2012	0.7576
P1420_004_Ap_A_2_POS_32	16.2	81.03	4	2.95	1.2239	0.0285	0.7476	0.7715
P1420_004_Ap_A_2_POS_32	12.87	68.7	4	2.95	1.2239	0.0285	0.7476	0.7715
P1420_004_Ap_A_2_POS_18	11.42	29.98	4	2.74	1.3456	0.0812	0.5732	0.7699
P1420_004_Ap_A_2_POS_18	14.92	64.17	4	2.74	1.3456	0.0812	0.5732	0.7699
P1420_004_Ap_A_2_POS_18	13.74	47.74	4	2.74	1.3456	0.0812	0.5732	0.7699
P1420_004_Ap_A_2_POS_7	11.3	-1	2	3.06	0.6051	0.1937	1.2012	0.7576
P1420_004_Ap_A_2_POS_7	10.18	73.61	2	3.06	0.6051	0.1937	1.2012	0.7576
P1420_004_Ap_A_2_POS_7	12.25	33.17	2	3.06	0.6051	0.1937	1.2012	0.7576
P1420_004_Ap_A_2_POS_7	12.2	56.55	2	3.06	0.6051	0.1937	1.2012	0.7576
P1420_004_Ap_A_2_POS_7	15.91	27.65	2	3.06	0.6051	0.1937	1.2012	0.7576
P1420_004_Ap_A_2_POS_37	16.29	25.43	3	2.62	1.1141	0.1265	0.7593	0.7516
P1420_004_Ap_A_2_POS_37	9.42	42.3	3	2.62	1.1141	0.1265	0.7593	0.7516
P1420_004_Ap_A_2_POS_37	8.54	66.67	3	2.62	1.1141	0.1265	0.7593	0.7516
P1420_004_Ap_A_2_POS_37	8.03	63.26	3	2.62	1.1141	0.1265	0.7593	0.7516
P1420_004_Ap_A_2_POS_50	16.29	42.54	1	4.39	0.8354	0.2031	0.9615	0.7397
P1420_004_Ap_A_2_POS_50	13.69	70.91	1	4.39	0.8354	0.2031	0.9615	0.7397
P1420_004_Ap_A_2_POS_10	8.11	63.63	2	3.31	0.605	0.1256	1.2694	0.7271
P1420_004_Ap_A_2_POS_10	13.62	43.15	2	3.31	0.605	0.1256	1.2694	0.7271
P1420_004_Ap_A_2_POS_40	13.32	41.85	2	3.35	1.0186	0.2142	0.7672	0.7182
P1420_004_Ap_A_2_POS_40	13.39	57.77	2	3.35	1.0186	0.2142	0.7672	0.7182
P1420_004_Ap_A_2_POS_40	14.43	50.43	2	3.35	1.0186	0.2142	0.7672	0.7182
P1420_004_Ap_A_2_POS_40	15.52	70.55	2	3.35	1.0186	0.2142	0.7672	0.7182
P1420_004_Ap_A_2_POS_40	13.14	54.62	2	3.35	1.0186	0.2142	0.7672	0.7182
P1420_004_Ap_A_2_POS_25	12.84	73.61	2	4.65	0.7549	0.2212	1.0239	0.7127
P1420_004_Ap_A_2_POS_33	15.55	56.11	1	4.33	0.8953	0.3805	0.7242	0.6161
Ave	13.005			3.17107	0.967164	0.159311	0.873511	0.743304
SD	2.42484			0.608364	0.288467	0.0745734	0.254163	0.0323929
JP019, Imperial Fm. (siltstone) Norman Wells Quarry section, ~0.73 %Ro, 65.266 N 126.738 W
Kinetic population #1 (rmr0 >0.85)
63	11.21	43.06	4	2.26	1.96492	0.0350828	-	0.8552
63	11.13	51.19	4	2.26	1.96492	0.0350828	-	0.8552
Ave	11.17			2.26	1.96492	0.0350828		0.8552
SD	0.0565685			0	0	0		0
Kinetic population #2 (0.74 < rmr0 < 0.85)
32	11.37	68.78	4	1.57914	1.8986	0.0023	0.0991	0.8511
32	11.47	57.12	4	1.57914	1.8986	0.0023	0.0991	0.8511
10	13.74	19.54	3	1.62906	1.8139	0.0371	0.149	0.8473
10	11.29	81.5	3	1.62906	1.8139	0.0371	0.149	0.8473
10	11.42	59.77	3	1.62906	1.8139	0.0371	0.149	0.8473
12	12.12	49.46	4	1.49927	1.6904	0.0086	0.301	0.8443
12	10.71	57.66	4	1.49927	1.6904	0.0086	0.301	0.8443
35	9.6	75.89	4	1.73889	1.5298	0.0131	0.4571	0.8405
35	10.73	63.86	4	1.73889	1.5298	0.0131	0.4571	0.8405
35	12.86	52.82	4	1.73889	1.5298	0.0131	0.4571	0.8405
35	11.98	76.84	4	1.73889	1.5298	0.0131	0.4571	0.8405
35	13.19	46.92	4	1.73889	1.5298	0.0131	0.4571	0.8405
35	13.99	22.02	4	1.73889	1.5298	0.0131	0.4571	0.8405
35	12.9	51.29	4	1.73889	1.5298	0.0131	0.4571	0.8405
24	16.55	22.14	2	1.46932	1.7533	0.0215	0.2252	0.8404
24	12.64	65.64	2	1.46932	1.7533	0.0215	0.2252	0.8404
31	11.72	76.85	3	1.40942	1.8116	0.0332	0.1552	0.8377
31	11.72	58.45	3	1.40942	1.8116	0.0332	0.1552	0.8377
31	10.8	27.38	3	1.40942	1.8116	0.0332	0.1552	0.8377
8	10.59	80.9	4	1.669	1.9791	0.0209	0	0.8344
8	12.07	43.15	4	1.669	1.9791	0.0209	0	0.8344
8	14.58	42.31	4	1.669	1.9791	0.0209	0	0.8344
8	14.41	40.43	4	1.669	1.9791	0.0209	0	0.8344
8	11.63	24.64	4	1.669	1.9791	0.0209	0	0.8344
7	12.61	43.77	4	1.75886	1.5682	0.0028	0.429	0.8329
23	12.62	68.44	3	1.68897	1.7669	0.0436	0.1895	0.8289
23	12.06	22.74	3	1.68897	1.7669	0.0436	0.1895	0.8289
25	11.47	64.14	4	2.05838	1.4883	0.0231	0.4886	0.8282
25	12.72	30.57	4	2.05838	1.4883	0.0231	0.4886	0.8282
25	13.31	43.93	4	2.05838	1.4883	0.0231	0.4886	0.8282
25	11.13	65.8	4	2.05838	1.4883	0.0231	0.4886	0.8282
30	12.32	51.29	4	2.3579	1.3368	0.0077	0.6555	0.8211
30	13.37	52.54	4	2.3579	1.3368	0.0077	0.6555	0.8211
30	11.41	76.08	4	2.3579	1.3368	0.0077	0.6555	0.8211
30	15.62	23.41	4	2.3579	1.3368	0.0077	0.6555	0.8211
30	15.75	57.92	4	2.3579	1.3368	0.0077	0.6555	0.8211
27	11.8	69.64	4	1.89863	1.3291	0.0609	0.61	0.8111
27	10.18	70.89	4	1.89863	1.3291	0.0609	0.61	0.8111
27	13.69	40.59	4	1.89863	1.3291	0.0609	0.61	0.8111
27	11.08	61.09	4	1.89863	1.3291	0.0609	0.61	0.8111
27	12.49	59.96	4	1.89863	1.3291	0.0609	0.61	0.8111
27	12.85	59.07	4	1.89863	1.3291	0.0609	0.61	0.8111
27	13.05	33.5	4	1.89863	1.3291	0.0609	0.61	0.8111
27	12.77	73.56	4	1.89863	1.3291	0.0609	0.61	0.8111
27	14.33	7.39	4	1.89863	1.3291	0.0609	0.61	0.8111
27	13.4	37.57	4	1.89863	1.3291	0.0609	0.61	0.8111
22	13.69	38.77	3	1.45934	1.2903	0.0906	0.6191	0.8098
3	12.43	61.7	2	1.88865	1.0777	0.0243	0.898	0.8067
6	13.03	56.73	3	2.26804	1.0955	0.0209	0.8836	0.8049
11	11.26	54.45	3	1.40942	1.9242	0.067	0.0088	0.7973
11	11.21	75.45	3	1.40942	1.9242	0.067	0.0088	0.7973
11	11.59	64.63	3	1.40942	1.9242	0.067	0.0088	0.7973
1	9.9	47.42	4	1.6091	1.9586	0.0414	0	0.797
1	8.92	78.56	4	1.6091	1.9586	0.0414	0	0.797
1	12.06	82.5	4	1.6091	1.9586	0.0414	0	0.797
1	13.93	25.44	4	1.6091	1.9586	0.0414	0	0.797
4	14.58	72.8	3	1.90862	1.0615	0.135	0.8035	0.7906
28	12.06	74.38	4	2.50766	1.2954	0.1088	0.5958	0.7874
28	14.84	30.09	4	2.50766	1.2954	0.1088	0.5958	0.7874
28	12.22	65.22	4	2.50766	1.2954	0.1088	0.5958	0.7874
28	11.74	44.64	4	2.50766	1.2954	0.1088	0.5958	0.7874
16	8.76	85.25	3	2.28801	0.7983	0.0855	1.1162	0.7855
16	8.05	81.04	3	2.28801	0.7983	0.0855	1.1162	0.7855
16	13.29	43.39	3	2.28801	0.7983	0.0855	1.1162	0.7855
16	14.94	18.73	3	2.28801	0.7983	0.0855	1.1162	0.7855
18	12.94	58.41	4	2.2281	1.1935	0.1688	0.6377	0.782
18	9.85	44.79	4	2.2281	1.1935	0.1688	0.6377	0.782
18	13	43.2	4	2.2281	1.1935	0.1688	0.6377	0.782
34	15.26	30.03	3	2.65742	0.905	0.0137	1.0813	0.782
34	13.5	44.42	3	2.65742	0.905	0.0137	1.0813	0.782
21	12.96	59.02	4	2.03841	1.7517	0.0637	0.1846	0.7734
13	12.58	67.09	3	2.07834	1.5325	0.2493	0.2182	0.771
13	14.68	31.93	3	2.07834	1.5325	0.2493	0.2182	0.771
13	14.5	42.39	3	2.07834	1.5325	0.2493	0.2182	0.771
13	13.14	52.65	3	2.07834	1.5325	0.2493	0.2182	0.771
13	12.63	53.09	3	2.07834	1.5325	0.2493	0.2182	0.771
13	13.26	43.34	3	2.07834	1.5325	0.2493	0.2182	0.771
13	12.18	56.97	3	2.07834	1.5325	0.2493	0.2182	0.771
13	15.58	22.52	3	2.07834	1.5325	0.2493	0.2182	0.771
13	14.06	33.23	3	2.07834	1.5325	0.2493	0.2182	0.771
36	14.19	61.77	3	1.96852	1.3264	0.1303	0.5433	0.7613
36	10.81	41.65	3	1.96852	1.3264	0.1303	0.5433	0.7613
36	12.99	41.41	3	1.96852	1.3264	0.1303	0.5433	0.7613
36	13.1	66.92	3	1.96852	1.3264	0.1303	0.5433	0.7613
36	14.44	53.97	3	1.96852	1.3264	0.1303	0.5433	0.7613
36	12.86	60.81	3	1.96852	1.3264	0.1303	0.5433	0.7613
2	15.86	46.76	4	2.4178	1.2152	0.3583	0.4265	0.7517
2	12.14	44.93	4	2.4178	1.2152	0.3583	0.4265	0.7517
26	13.43	64.55	4	1.94855	1.3338	0.1139	0.5523	0.7419
26	13.11	44.77	4	1.94855	1.3338	0.1139	0.5523	0.7419
60	15.15	39.35	4	2.28	1.96199	0.0380089	-	0.8507
60	11.98	70.15	4	2.28	1.96199	0.0380089	-	0.8507
60	14.14	51.28	4	2.28	1.96199	0.0380089	-	0.8507
53	12.55	52.56	4	2.14	1.96617	0.0338309	-	0.8505
53	11.15	63.22	4	2.14	1.96617	0.0338309	-	0.8505
53	12.24	39.49	4	2.14	1.96617	0.0338309	-	0.8505
53	14.28	30.69	4	2.14	1.96617	0.0338309	-	0.8505
53	11.06	41.26	4	2.14	1.96617	0.0338309	-	0.8505
41	15.49	49	4	2.12	1.96079	0.0392091	-	0.8502
41	14.32	60.83	4	2.12	1.96079	0.0392091	-	0.8502
22	12.66	23.88	4	2.02	1.9689	0.0310989	-	0.8497
22	12.62	63.95	4	2.02	1.9689	0.0310989	-	0.8497
22	12.16	39.02	4	2.02	1.9689	0.0310989	-	0.8497
22	14.75	26.81	4	2.02	1.9689	0.0310989	-	0.8497
33	12.84	74.47	3	2.86	1.94766	0.052337	-	0.8495
13	12.96	54.78	4	2.85	1.93418	0.0658196	-	0.8467
13	13.82	36.55	4	2.85	1.93418	0.0658196	-	0.8467
13	13.78	38.05	4	2.85	1.93418	0.0658196	-	0.8467
13	12.09	58.3	4	2.85	1.93418	0.0658196	-	0.8467
13	12.41	47.32	4	2.85	1.93418	0.0658196	-	0.8467
13	13.28	31.77	4	2.85	1.93418	0.0658196	-	0.8467
13	12.43	54.45	4	2.85	1.93418	0.0658196	-	0.8467
61	11.33	58.14	4	2.56	1.9461	0.0538958	-	0.8462
61	10.08	44.77	4	2.56	1.9461	0.0538958	-	0.8462
61	12.7	48.67	4	2.56	1.9461	0.0538958	-	0.8462
61	11.51	79.17	4	2.56	1.9461	0.0538958	-	0.8462
32	12.35	67.58	4	2.43	1.99264	0.00736048	-	0.8461
32	14.04	35.93	4	2.43	1.99264	0.00736048	-	0.8461
32	15.42	73.57	4	2.43	1.99264	0.00736048	-	0.8461
32	11.79	65.75	4	2.43	1.99264	0.00736048	-	0.8461
59	13.49	59.3	4	2.06	1.93241	0.0675851	-	0.8439
59	12.95	60.38	4	2.06	1.93241	0.0675851	-	0.8439
59	12.48	45.03	4	2.06	1.93241	0.0675851	-	0.8439
59	11.51	60.62	4	2.06	1.93241	0.0675851	-	0.8439
3	15.01	17.73	4	2.35	1.94609	0.0539105	-	0.8436
12	15.91	40.01	4	2.28	1.98598	0.0140249	-	0.8423
12	8.99	58.5	4	2.28	1.98598	0.0140249	-	0.8423
12	13.57	28.49	4	2.28	1.98598	0.0140249	-	0.8423
12	11.77	51.01	4	2.28	1.98598	0.0140249	-	0.8423
12	12.8	45.79	4	2.28	1.98598	0.0140249	-	0.8423
21	14.49	64.78	4	2.77	1.92941	0.0705859	-	0.8417
21	12.26	74.18	4	2.77	1.92941	0.0705859	-	0.8417
55	12.22	62.08	3	2.29	1.95282	0.0471803	-	0.8412
55	12.25	80.85	3	2.29	1.95282	0.0471803	-	0.8412
40	10.52	64.41	4	2.24	1.98947	0.0105301	-	0.8392
40	11.59	56.43	4	2.24	1.98947	0.0105301	-	0.8392
40	15.58	39.63	4	2.24	1.98947	0.0105301	-	0.8392
29	10.92	41.77	2	2.43	1.97506	0.0249375	-	0.8372
29	11.45	59.83	2	2.43	1.97506	0.0249375	-	0.8372
29	11.85	37.66	2	2.43	1.97506	0.0249375	-	0.8372
29	12.83	25.3	2	2.43	1.97506	0.0249375	-	0.8372
29	11.62	58.15	2	2.43	1.97506	0.0249375	-	0.8372
50	13.01	35.01	4	2.31	1.88493	0.115071	-	0.8267
50	13.22	56.6	4	2.31	1.88493	0.115071	-	0.8267
50	14.36	45.2	4	2.31	1.88493	0.115071	-	0.8267
37	13.98	42.5	4	2.63	1.92895	0.0710484	-	0.8259
24	14.74	42.97	4	2.42	1.97913	0.0208655	-	0.8244
24	15.53	42.65	4	2.42	1.97913	0.0208655	-	0.8244
24	13.59	70.6	4	2.42	1.97913	0.0208655	-	0.8244
24	12.35	82.78	4	2.42	1.97913	0.0208655	-	0.8244
17	13.12	54.01	4	2.02	1.99551	0.00449136	-	0.8145
17	12.62	15.14	4	2.02	1.99551	0.00449136	-	0.8145
17	12.69	35.27	4	2.02	1.99551	0.00449136	-	0.8145
19	15.43	15.98	4	2.73	1.8935	0.1065	-	0.8124
19	13.7	33.7	4	2.73	1.8935	0.1065	-	0.8124
38	15.01	59.08	3	2.13	1.8156	0.184399	-	0.8114
38	12.13	50.08	3	2.13	1.8156	0.184399	-	0.8114
38	15.24	16.13	3	2.13	1.8156	0.184399	-	0.8114
34	12.54	48.85	4	2.4	1.83225	0.167753	-	0.8102
34	10.64	82.59	4	2.4	1.83225	0.167753	-	0.8102
34	13.26	80.22	4	2.4	1.83225	0.167753	-	0.8102
34	12.18	61.53	4	2.4	1.83225	0.167753	-	0.8102
45	8.56	66.52	4	2.44	1.95299	0.047013	-	0.8073
45	13.82	35.66	4	2.44	1.95299	0.047013	-	0.8073
45	13.17	82.54	4	2.44	1.95299	0.047013	-	0.8073
23	12.95	65.88	4	2.9	1.8676	0.1324	-	0.807
23	9.42	74.06	4	2.9	1.8676	0.1324	-	0.807
23	14.2	46.55	4	2.9	1.8676	0.1324	-	0.807
28	9.62	45.6	3	2.56	1.95868	0.0413228	-	0.8064
28	13.79	67.03	3	2.56	1.95868	0.0413228	-	0.8064
28	12.23	86.35	3	2.56	1.95868	0.0413228	-	0.8064
9	13.83	68.23	4	1.74	1.80401	0.195994	-	0.8025
9	12.05	56.61	4	1.74	1.80401	0.195994	-	0.8025
9	10.57	83.73	4	1.74	1.80401	0.195994	-	0.8025
6	13.7	48.59	4	2.57	1.84042	0.159582	-	0.8004
6	13.76	76.29	4	2.57	1.84042	0.159582	-	0.8004
6	13.58	82.71	4	2.57	1.84042	0.159582	-	0.8004
6	13.8	44.21	4	2.57	1.84042	0.159582	-	0.8004
6	14.99	59.23	4	2.57	1.84042	0.159582	-	0.8004
6	13.35	51.81	4	2.57	1.84042	0.159582	-	0.8004
57	14.21	28.14	2	2.48	1.76313	0.236866	-	0.7988
57	13.94	37.04	2	2.48	1.76313	0.236866	-	0.7988
25	12.99	64.43	4	2.66	1.90795	0.0920471	-	0.7892
25	11.77	38.48	4	2.66	1.90795	0.0920471	-	0.7892
25	11.74	60.8	4	2.66	1.90795	0.0920471	-	0.7892
25	11.64	79.43	4	2.66	1.90795	0.0920471	-	0.7892
25	11.49	70.07	4	2.66	1.90795	0.0920471	-	0.7892
25	11.74	81.88	4	2.66	1.90795	0.0920471	-	0.7892
25	14.82	36.12	4	2.66	1.90795	0.0920471	-	0.7892
25	15.02	24.62	4	2.66	1.90795	0.0920471	-	0.7892
25	14.15	51.42	4	2.66	1.90795	0.0920471	-	0.7892
25	12.23	69.75	4	2.66	1.90795	0.0920471	-	0.7892
25	14.51	36.88	4	2.66	1.90795	0.0920471	-	0.7892
25	11.62	65.67	4	2.66	1.90795	0.0920471	-	0.7892
54	13.32	89.39	4	2.46	1.86868	0.131323	-	0.7886
15	11.99	42.57	4	1.96	1.94283	0.0571731	-	0.7874
15	12.64	73.66	4	1.96	1.94283	0.0571731	-	0.7874
31	15.8	25.07	4	2.33	1.88097	0.119026	-	0.7855
31	13.31	54.27	4	2.33	1.88097	0.119026	-	0.7855
31	11.97	53.62	4	2.33	1.88097	0.119026	-	0.7855
31	11.28	58.37	4	2.33	1.88097	0.119026	-	0.7855
58	12.65	65.14	4	2.64	1.8511	0.148897	-	0.7839
58	14.75	30.38	4	2.64	1.8511	0.148897	-	0.7839
58	13.7	34.85	4	2.64	1.8511	0.148897	-	0.7839
4	12.32	89.96	4	2.36	1.88794	0.112055	-	0.7813
4	13	65.06	4	2.36	1.88794	0.112055	-	0.7813
4	11.2	45.93	4	2.36	1.88794	0.112055	-	0.7813
44	15.71	62.42	4	2.45	1.86889	0.13111	-	0.7812
7	14.2	47.51	4	2.23	1.91789	0.082115	-	0.7777
42	11.78	60.02	4	2.94	1.8847	0.1153	-	0.7769
42	13.41	23.96	4	2.94	1.8847	0.1153	-	0.7769
42	12.62	38.01	4	2.94	1.8847	0.1153	-	0.7769
62	12.27	57.16	4	2.95	1.74947	0.250528	-	0.7739
62	12.66	44.92	4	2.95	1.74947	0.250528	-	0.7739
62	11.59	73.29	4	2.95	1.74947	0.250528	-	0.7739
62	12.46	66.9	4	2.95	1.74947	0.250528	-	0.7739
62	11.88	63.3	4	2.95	1.74947	0.250528	-	0.7739
62	13	55.67	4	2.95	1.74947	0.250528	-	0.7739
62	13.7	41.48	4	2.95	1.74947	0.250528	-	0.7739
27	12.96	57.22	4	2.41	1.87572	0.124277	-	0.7733
27	13.61	37.52	4	2.41	1.87572	0.124277	-	0.7733
27	14.22	55.65	4	2.41	1.87572	0.124277	-	0.7733
27	10.58	54.24	4	2.41	1.87572	0.124277	-	0.7733
27	13.31	68.84	4	2.41	1.87572	0.124277	-	0.7733
27	11.36	50.74	4	2.41	1.87572	0.124277	-	0.7733
36	14.67	74	3	2.24	1.85796	0.142039	-	0.77
46	12.45	36.19	4	2.16	-	-	-	-
46	12.97	39.04	4	2.16	-	-	-	-
46	11.96	48.69	4	2.16	-	-	-	-
46	11.73	71.97	4	2.16	-	-	-	-
1	13.64	47.47	4	2.03	-	-	-	-
1	12.09	79.07	4	2.03	-	-	-	-
8	12.06	48.02	4	2.2	-	-	-	-
11	14.69	33.79	4	2.56	-	-	-	-
14	14.16	7.58	4	2.11	-	-	-	-
14	15.54	35.37	4	2.11	-	-	-	-
16	13.94	35.01	4	2.21	-	-	-	-
16	13.59	70.58	4	2.21	-	-	-	-
26	14.15	31.13	4	2.16	-	-	-	-
26	10.64	72.2	4	2.16	-	-	-	-
26	10.07	49.15	4	2.16	-	-	-	-
39	14.37	50.42	4	2.34	-	-	-	-
39	12.48	43.48	4	2.34	-	-	-	-
39	9.6	61.72	4	2.34	-	-	-	-
39	12.38	58.06	4	2.34	-	-	-	-
47	14.48	70.83	4	2.71	-	-	-	-
49	14.44	64.79	4	2.48	-	-	-	-
49	13.43	48.88	4	2.48	-	-	-	-
49	15.01	39.03	4	2.48	-	-	-	-
49	11.39	74.32	4	2.48	-	-	-	-
49	11.21	45.63	4	2.48	-	-	-	-
51	14.31	73.09	4	2.11	-	-	-	-
51	13.95	71.67	4	2.11	-	-	-	-
Ave	12.8156			2.24479	1.73992	0.0874143	0.433588	0.810695
SD	1.53095			0.378051	0.28784	0.0736111	0.296984	0.0288913
Kinetic population #3 (rmr0 < 0.74)
9	11.45	43.23	4	1.89863	1.6009	0.1263	0.2728	0.7861
9	12.27	64.83	4	1.89863	1.6009	0.1263	0.2728	0.7861
9	12.45	39.62	4	1.89863	1.6009	0.1263	0.2728	0.7861
9	15	14.05	4	1.89863	1.6009	0.1263	0.2728	0.7861
9	11.47	26.82	4	1.89863	1.6009	0.1263	0.2728	0.7861
29	12.65	54.41	4	2.67738	1.3233	0.2139	0.4628	0.7324
29	13.33	57.44	4	2.67738	1.3233	0.2139	0.4628	0.7324
29	13.32	44	4	2.67738	1.3233	0.2139	0.4628	0.7324
15	15.57	25.15	3	2.21812	1.1959	0.2229	0.5812	0.7251
20	14.45	35.39	4	1.98849	1.0637	0.2029	0.7334	0.7127
20	12.53	47.09	4	1.98849	1.0637	0.2029	0.7334	0.7127
20	12.35	56.31	4	1.98849	1.0637	0.2029	0.7334	0.7127
20	15.12	64.05	4	1.98849	1.0637	0.2029	0.7334	0.7127
19	12	53.39	4	2.75726	0.8355	0.3136	0.8509	0.6857
19	14.74	43.08	4	2.75726	0.8355	0.3136	0.8509	0.6857
19	15.87	14	4	2.75726	0.8355	0.3136	0.8509	0.6857
19	11.16	70.36	4	2.75726	0.8355	0.3136	0.8509	0.6857
33	14.6	47.53	4	2.4777	0.9155	0.2856	0.7989	0.6824
33	13.03	73.24	4	2.4777	0.9155	0.2856	0.7989	0.6824
33	14.08	43.5	4	2.4777	0.9155	0.2856	0.7989	0.6824
33	12.03	69.65	4	2.4777	0.9155	0.2856	0.7989	0.6824
17	10.69	88.47	4	2.90702	1.0192	0.3648	0.616	0.6814
17	15.35	40.33	4	2.90702	1.0192	0.3648	0.616	0.6814
17	14.65	24.92	4	2.90702	1.0192	0.3648	0.616	0.6814
14	12.81	60.42	3	2.71732	0.6278	0.2511	1.1211	0.6663
14	14.5	51.12	3	2.71732	0.6278	0.2511	1.1211	0.6663
14	15.19	42.45	3	2.71732	0.6278	0.2511	1.1211	0.6663
14	13.92	59.7	3	2.71732	0.6278	0.2511	1.1211	0.6663
14	14.53	25.1	3	2.71732	0.6278	0.2511	1.1211	0.6663
14	12.72	53.11	3	2.71732	0.6278	0.2511	1.1211	0.6663
14	14.69	83.42	3	2.71732	0.6278	0.2511	1.1211	0.6663
14	16.02	67.91	3	2.71732	0.6278	0.2511	1.1211	0.6663
5	13.48	75.02	4	1.88865	-	-	-	-
5	14.67	19.77	4	1.88865	-	-	-	-
5	10.93	62.83	4	1.88865	-	-	-	-
10	13.25	46.04	4	2.96	1.76088	0.239118	-	0.7617
10	13.51	30.14	4	2.96	1.76088	0.239118	-	0.7617
10	13.73	42.31	4	2.96	1.76088	0.239118	-	0.7617
20	16.01	16.12	4	2.77	1.74524	0.254765	-	0.7599
20	12.48	77.4	4	2.77	1.74524	0.254765	-	0.7599
20	12.24	79.12	4	2.77	1.74524	0.254765	-	0.7599
20	16.39	28.08	4	2.77	1.74524	0.254765	-	0.7599
48	15.31	73.1	4	3.28	1.74222	0.257777	-	0.7548
48	16.4	9.3	4	3.28	1.74222	0.257777	-	0.7548
43	14.08	61.84	4	2.75	1.74313	0.256867	-	0.747
43	16.08	28.73	4	2.75	1.74313	0.256867	-	0.747
43	16.29	22.85	4	2.75	1.74313	0.256867	-	0.747
43	16	32.93	4	2.75	1.74313	0.256867	-	0.747
2	13.24	30.24	4	2.41	1.70174	0.298262	-	0.7432
2	13.06	54.08	4	2.41	1.70174	0.298262	-	0.7432
35	13.59	53.44	4	2.83	1.68649	0.313511	-	0.7318
35	14.28	48.18	4	2.83	1.68649	0.313511	-	0.7318
35	15.25	41.86	4	2.83	1.68649	0.313511	-	0.7318
35	13.86	40.12	4	2.83	1.68649	0.313511	-	0.7318
35	13.58	78.86	4	2.83	1.68649	0.313511	-	0.7318
35	13.57	76.78	4	2.83	1.68649	0.313511	-	0.7318
35	13.54	37.28	4	2.83	1.68649	0.313511	-	0.7318
35	14.59	62.7	4	2.83	1.68649	0.313511	-	0.7318
35	14.23	32.05	4	2.83	1.68649	0.313511	-	0.7318
35	12.84	70.77	4	2.83	1.68649	0.313511	-	0.7318
30	13.34	78.08	4	3.27	1.44401	0.55599	-	0.6488
56	11.61	60.79	4	2.48	1.88901	0.11099	-	0.6451
56	14.05	44.28	4	2.48	1.88901	0.11099	-	0.6451
5	13.3	75.99	4	3.04	-	-	-	-
5	13.17	13.9	4	3.04	-	-	-	-
18	12.46	87.05	4	2.92	-	-	-	-
18	13.73	34.11	4	2.92	-	-	-	-
52	11.57	82.59	4	3.13	-	-	-	-
52	13.46	53.19	4	3.13	-	-	-	-
52	13.4	59.83	4	3.13	-	-	-	-
52	13.84	52.15	4	3.13	-	-	-	-
Ave	13.7317			2.64891	1.34533	0.259946		0.718605
SD	1.40909			0.384201	0.431962	0.0739807		0.0403399
10FNARL008, Imperial Fm. (lithic arenite) Carcajou River section, ~0.74 %Ro, 64.752 N, 126.778 W
Kinetic population #1 (rmr0 > 0.86)
P1392_015_Ap_A_1_POS_4	12.08	52.19	4	2.41	2	0	-	0.8567
P1392_015_Ap_A_1_POS_4	10.76	62.76	4	2.41	2	0	-	0.8567
Kinetic population #2 (0.76 < rmr0 < 0.86)
P1392_015_Ap_A_1_POS_3	13.07	81.75	4	2.63	1.94022	0.0597798	-	0.8479
P1392_015_Ap_A_1_POS_3	14.05	84.27	4	2.63	1.94022	0.0597798	-	0.8479
P1392_015_Ap_A_1_POS_3	11.85	37.49	4	2.63	1.94022	0.0597798	-	0.8479
P1392_015_Ap_A_1_POS_3	14.67	59.71	4	2.63	1.94022	0.0597798	-	0.8479
P1392_015_Ap_A_1_POS_3	11.64	60.73	4	2.63	1.94022	0.0597798	-	0.8479
P1392_015_Ap_A_1_POS_12	13.18	79.65	4	2.21	1.95573	0.0442709	-	0.8471
P1392_015_Ap_A_1_POS_12	15.93	75.77	4	2.21	1.95573	0.0442709	-	0.8471
P1392_015_Ap_A_1_POS_12	13.72	58.43	4	2.21	1.95573	0.0442709	-	0.8471
P1392_015_Ap_A_1_POS_12	13.35	31.74	4	2.21	1.95573	0.0442709	-	0.8471
P1392_015_Ap_A_1_POS_12	13.59	63.72	4	2.21	1.95573	0.0442709	-	0.8471
P1392_015_Ap_A_1_POS_10	11.85	47.37	4	2.82	1.97269	0.0273148	-	0.8438
P1392_015_Ap_A_1_POS_10	11.93	51.23	4	2.82	1.97269	0.0273148	-	0.8438
P1392_015_Ap_A_1_POS_8	16.47	42.93	4	2.58	1.85135	0.14865	-	0.8164
P1392_015_Ap_A_1_POS_8	12.77	42.34	4	2.58	1.85135	0.14865	-	0.8164
P1392_015_Ap_A_1_POS_5	15.09	57.63	4	2.34	1.79834	0.201658	-	0.8051
P1392_015_Ap_A_1_POS_5	10.76	69.86	4	2.34	1.79834	0.201658	-	0.8051
P1392_015_Ap_A_1_POS_5	12.4	47.7	4	2.34	1.79834	0.201658	-	0.8051
P1392_015_Ap_A_1_POS_5	13	38.41	4	2.34	1.79834	0.201658	-	0.8051
P1392_015_Ap_A_1_POS_5	14.18	60.45	4	2.34	1.79834	0.201658	-	0.8051
P1392_015_Ap_A_1_POS_5	13.55	77.03	4	2.34	1.79834	0.201658	-	0.8051
P1392_015_Ap_A_1_POS_5	13.38	77.81	4	2.34	1.79834	0.201658	-	0.8051
P1392_015_Ap_A_1_POS_5	12.28	46.57	4	2.34	1.79834	0.201658	-	0.8051
P1392_015_Ap_A_1_POS_11	14.03	56.02	4	2.34	1.95705	0.0429499	-	0.8047
P1392_015_Ap_A_1_POS_11	14.27	53.64	4	2.34	1.95705	0.0429499	-	0.8047
P1392_015_Ap_A_1_POS_11	14.35	58.82	4	2.34	1.95705	0.0429499	-	0.8047
P1392_015_Ap_A_1_POS_11	14.36	70.47	4	2.34	1.95705	0.0429499	-	0.8047
P1392_015_Ap_A_1_POS_11	15.02	61.27	4	2.34	1.95705	0.0429499	-	0.8047
P1392_015_Ap_A_1_POS_11	12.58	49.46	4	2.34	1.95705	0.0429499	-	0.8047
P1392_015_Ap_A_1_POS_2	15.96	45.77	4	2.55	1.82599	0.174006	-	0.782
P1392_015_Ap_A_1_POS_6	15.03	75.7	4	2.33	1.6787	0.321297	-	0.7807
P1392_015_Ap_A_1_POS_6	14.35	33.77	4	2.33	1.6787	0.321297	-	0.7807
P1392_015_Ap_A_1_POS_6	13.7	65.69	4	2.33	1.6787	0.321297	-	0.7807
P1392_015_Ap_A_1_POS_6	13	89.33	4	2.33	1.6787	0.321297	-	0.7807
P1392_015_Ap_A_1_POS_0	11.49	64.1	4	2.31	1.79052	0.209476	-	0.7663
P1392_015_Ap_A_1_POS_0	14.35	73.95	4	2.31	1.79052	0.209476	-	0.7663
Ave	13.5771			2.40714	1.86796	0.132037		0.814337
SD	1.34581			0.168864	0.098598	0.098598		0.0266626
Kinetic population # 3 (rmr0 < 0.76)
P1392_015_Ap_A_1_POS_7	12.95	64.94	4	3.18	1.58906	0.41094	-	0.7418
P1392_015_Ap_A_1_POS_7	11.74	39.58	4	3.18	1.58906	0.41094	-	0.7418
P1392_015_Ap_A_1_POS_7	11.59	81.84	4	3.18	1.58906	0.41094	-	0.7418
P1392_015_Ap_A_1_POS_7	12.42	54.34	4	3.18	1.58906	0.41094	-	0.7418
P1392_015_Ap_A_1_POS_9	14.1	61.1	4	2.33	1.72633	0.273667	-	0.7194
P1392_015_Ap_A_1_POS_1	14.42	42.43	4	2.42	1.89516	0.104839	-	0.7019
P1392_015_Ap_A_1_POS_1	10.69	82.33	4	2.42	1.89516	0.104839	-	0.7019
P1392_015_Ap_A_1_POS_1	13.69	57.02	4	2.42	1.89516	0.104839	-	0.7019
P1392_015_Ap_A_1_POS_1	10.08	56.8	4	2.42	1.89516	0.104839	-	0.7019
P1392_015_Ap_A_1_POS_1	10.21	72.16	4	2.42	1.89516	0.104839	-	0.7019
Ave	12.189			2.715	1.75584	0.244162		0.71961
SD	1.58768			0.401144	0.152455	0.152455		0.0198266
Husky6, Imperial Fm. (fine grain sandstone) Redstone River section, ~1.67 %Ro, 63.954 N, 125.047 W
Kinetic population #1 (rmr0 > 0.81)
1	16	21.21	3	1.46	1.9943	0.0057	0	0.859055
2	15.85	34.05	4	1.89	1.9971	0.0029	0	0.857757
3	13.36	37.65	3	1.62	1.9667	0.0059	0.0274	0.854808
4	10.58	64.04	3	1.62	1.9667	0.0059	0.0274	0.854808
5	14.7	43.36	4	1.41	1.8252	0.0087	0.1661	0.854669
6	12.82	38.8	4	1.41	1.8252	0.0087	0.1661	0.854669
7	12.54	74.29	4	1.41	1.8252	0.0087	0.1661	0.854669
8	11.31	75.64	2	1.45	1.9816	0.0184	0	0.853548
9	9.33	28.76	2	1.45	1.9313	0.0029	0.0658	0.853149
10	9.26	51.32	2	1.45	1.9313	0.0029	0.0658	0.853149
11	14.42	39.6	4	1.38	1.9668	0.0116	0.0216	0.852621
12	13.66	69.3	4	1.38	1.9668	0.0116	0.0216	0.852621
13	14.17	69.72	4	1.38	1.9668	0.0116	0.0216	0.852621
14	14.54	32.49	4	1.31	1.8245	0.0029	0.1726	0.850607
15	8.29	52.18	4	1.31	1.8245	0.0029	0.1726	0.850607
16	10.35	41.53	4	1.31	1.8245	0.0029	0.1726	0.850607
17	14.74	39.34	4	1.31	1.8245	0.0029	0.1726	0.850607
18	14.34	44.35	4	1.31	1.8245	0.0029	0.1726	0.850607
19	14.67	31.8	4	1.31	1.8245	0.0029	0.1726	0.850607
20	13.44	39.97	4	1.31	1.8245	0.0029	0.1726	0.850607
21	11.37	65.3	4	1.31	1.8245	0.0029	0.1726	0.850607
22	13.75	30.31	4	1.31	1.8245	0.0029	0.1726	0.850607
23	14.49	78.36	4	1.39	1.9942	0.0058	0	0.848504
24	11.57	80.22	4	1.09	1.9763	0.0237	0	0.846512
25	9.35	45.34	4	1.62	1.7539	0.0404	0.2057	0.845772
26	9.72	39.03	4	1.34	1.7722	0.0236	0.2042	0.845124
27	8.79	54.38	3	1.33	1.7312	0.0465	0.2223	0.844531
28	13.52	84.81	2	1.6	1.6939	0.0152	0.2909	0.842571
29	10.51	50.18	4	1.53	1.9343	0.0657	0	0.840675
30	14.54	45.21	4	1.36	1.9673	0.0327	0	0.839687
31	14.57	46.42	4	1.36	1.9673	0.0327	0	0.839687
32	15.38	52.89	3	1.35	1.9139	0.0861	0	0.838827
33	14.81	81.44	4	1.52	1.6116	0.0057	0.3827	0.837358
34	12.3	32.83	4	1.4	1.635	0.0321	0.3329	0.83694
35	11.5	68.67	4	1.4	1.635	0.0321	0.3329	0.83694
36	11.2	20.42	3	1.38	1.6498	0.0351	0.3151	0.836019
37	10.9	38.18	4	1.54	1.666	0.032	0.302	0.83451
38	12.32	73.56	4	1.54	1.666	0.032	0.302	0.83451
39	13.68	20.01	4	1.54	1.666	0.032	0.302	0.83451
40	10.8	49.57	4	1.54	1.666	0.032	0.302	0.83451
41	12.09	54.69	2	1.67	1.5565	0.0236	0.4199	0.831957
42	9.93	55.6	4	1.34	1.9504	0.0496	0	0.831775
43	13.68	76.82	4	1.47	1.9735	0.012	0.0145	0.830938
44	13.21	69.13	4	1.47	1.9735	0.012	0.0145	0.830938
45	14.18	44.33	4	1.81	1.4691	0.0291	0.5018	0.825472
46	13.09	71.77	4	1.81	1.4691	0.0291	0.5018	0.825472
47	10.22	41.93	4	1.81	1.4691	0.0291	0.5018	0.825472
48	10.56	50.97	4	1.81	1.4691	0.0291	0.5018	0.825472
49	12.57	70.03	4	1.81	1.4691	0.0291	0.5018	0.825472
50	12.26	70.85	4	1.59	1.3682	0.0084	0.6234	0.823725
51	14.66	42.39	4	1.59	1.3682	0.0084	0.6234	0.823725
52	11.56	49.5	4	1.59	1.3682	0.0084	0.6234	0.823725
53	9.43	53.74	4	1.59	1.3682	0.0084	0.6234	0.823725
54	14.39	55.09	4	1.85	1.2515	0.0462	0.7023	0.818979
55	11.69	65.26	4	1.85	1.2515	0.0462	0.7023	0.818979
56	9.62	69.72	4	1.85	1.2515	0.0462	0.7023	0.818979
57	9.65	46.01	4	1.55	1.4703	0.0176	0.5121	0.818165
58	11.11	72.7	3	1.18	1.1729	0.0058	0.8213	0.817779
59	9.59	61.42	4	1.78	1.4906	0.0933	0.4161	0.817422
60	13.95	57.21	4	1.77	1.4961	0.12	0.3839	0.816295
61	9.8	52.32	4	1.69	1.579	0.0666	0.3544	0.815771
62	11.31	65.25	4	1.69	1.579	0.0666	0.3544	0.815771
63	17.57	15.91	4	1.69	1.579	0.0666	0.3544	0.815771
64	13.24	48.12	3	1.61	1.6376	0.1279	0.2345	0.813022
65	8.73	79.68	2	1.79	1.4676	0.134	0.3984	0.812737
66	10.91	54.85	2	1.79	1.4676	0.134	0.3984	0.812737
67	10.39	32.76	2	1.79	1.4676	0.134	0.3984	0.812737
68	10.84	69.43	4	1.24	1.9675	0.0325	0	0.812437
69	12.17	51.46	2	1.5	1.7247	0.0933	0.182	0.809597
Ave	12.2586			1.52043	1.70423	0.0325232	0.263251	0.835882
SD	2.11045			0.193637	0.229532	0.0354844	0.220269	0.0149311
Kinetic population #2 (rmr0 < 0.81)
70	11.59	56.7	4	1.52	1.5282	0.132	0.3398	0.80626
71	13.75	47.14	4	1.65	1.5058	0.1636	0.3306	0.804063
72	11.09	58.25	4	1.65	1.5058	0.1636	0.3306	0.804063
73	11.86	42.61	4	1.65	1.5058	0.1636	0.3306	0.804063
74	15.88	50.37	4	1.65	1.3858	0.0935	0.5207	0.800472
75	10.09	68.34	4	1.65	1.3858	0.0935	0.5207	0.800472
76	14.24	50.38	4	1.65	1.3858	0.0935	0.5207	0.800472
77	15.36	26.04	3	1.96	1.5468	0.0808	0.3724	0.79995
78	13.85	44.77	2	1.3	1.8515	0.0466	0.1019	0.799527
79	13.72	73.55	4	1.3	1.9913	0.0087	0	0.797841
80	11.58	50.36	4	1.3	1.9913	0.0087	0	0.797841
81	11.3	54.14	4	1.91	1.6296	0.2462	0.1242	0.792509
82	15.07	41.92	4	2.02	1.3486	0.1718	0.4796	0.785376
83	10.55	78.24	4	2.02	1.3486	0.1718	0.4796	0.785376
84	13.37	19.75	4	2.02	1.3486	0.1718	0.4796	0.785376
85	12.9	55.18	4	2.02	1.3486	0.1718	0.4796	0.785376
86	12.6	37.89	4	2.02	1.3486	0.1718	0.4796	0.785376
87	13.24	19.44	3	2.01	1.2333	0.1478	0.6189	0.781302
88	15.53	62.69	3	2.01	1.2333	0.1478	0.6189	0.781302
89	12.17	85.04	3	2.01	1.2333	0.1478	0.6189	0.781302
90	9.92	77.31	4	1.66	1.8972	0.1028	0	0.771594
91	12.21	25.74	3	1.42	1.6737	0.1029	0.2234	0.763406
92	13.56	59.14	4	2.27	1.4694	0.1179	0.4127	0.76326
93	14.48	70.82	4	2.27	1.4694	0.1179	0.4127	0.76326
94	13.63	23.52	4	2.27	1.4694	0.1179	0.4127	0.76326
95	12.37	41.94	4	2.09	1.7241	0.1777	0.0982	0.762255
96	10.6	50.7	4	2.09	1.7241	0.1777	0.0982	0.762255
97	13.02	27.4	2	2.06	1.7925	0.1458	0.0617	0.75634
98	12.19	41.66	3	2.14	1.6155	0.3845	0	0.754501
99	14.06	32.36	3	2.14	1.6155	0.3845	0	0.754501
100	13.46	77.65	3	2.14	1.6155	0.3845	0	0.754501
101	15.05	48.58	3	2.14	1.6155	0.3845	0	0.754501
102	15.55	24.16	2	1.92	1.7131	0.2869	0	0.746214
103	13.95	41.48	4	1.73	1.2999	0.2284	0.4717	0.738986
104	11.6	59.68	4	1.73	1.2999	0.2284	0.4717	0.738986
105	13.75	59.89	2	1.77	1.1689	0.21	0.6211	0.728924
106	12.18	70.64	2	1.77	1.1689	0.21	0.6211	0.728924
107	12.56	73.97	3	2.12	1.0599	0.1731	0.767	0.723046
108	11.89	69.4	2	2.13	1.4447	0.3244	0.2309	0.722518
109	13.1	27.63	4	1.93	1.6365	0.1945	0.169	0.721483
110	13.24	38.78	4	1.93	1.6365	0.1945	0.169	0.721483
111	13.87	56.75	4	2.61	1.5376	0.4601	0.0023	0.720935
112	13.55	48.29	4	2.61	1.5376	0.4601	0.0023	0.720935
113	10.64	84.74	2	2.17	1.1378	0.2107	0.6515	0.719237
114	12.55	62.03	4	1.79	1.2647	0.1777	0.5576	0.718733
115	13.07	20.85	4	1.79	1.2647	0.1777	0.5576	0.718733
116	13.68	49.27	4	2.44	1.3454	0.2669	0.3877	0.710739
117	13.45	82.11	4	2.3	1.0887	0.2915	0.6198	0.652314
Ave	12.9775			1.93229	1.47798	0.193546	0.328475	0.761128
SD	1.46003			0.307365	0.226759	0.105177	0.236166	0.0344207
Husky7, Imperial Fm. (fine grain sandstone) Redstone River section, ~1.67 %Ro, 63.916 N, 125.198W
Kinetic population #1 (rmr0 > 0.85)
1	12.35	31.53	3	1.54	1.9971	0.0029	0	0.869973
2	13.35	51.09	3	1.54	1.9971	0.0029	0	0.869973
3	13.46	57.78	4	1.85	1.9971	0.0029	0	0.864003
4	12.37	36.65	4	1.85	1.9971	0.0029	0	0.864003
5	13.6	39.54	4	1.85	1.9971	0.0029	0	0.864003
6	11.8	41.95	4	1.18	1.9791	0.0209	0	0.856579
7	14.46	51.43	4	1.18	1.9791	0.0209	0	0.856579
8	14.59	73.36	4	1.18	1.9791	0.0209	0	0.856579
9	13.1	38.96	4	1.18	1.9791	0.0209	0	0.856579
10	14.79	19.47	4	1.18	1.9791	0.0209	0	0.856579
11	14.05	47.86	4	1.37	1.9875	0.0125	0	0.854041
12	16.22	76.95	3	1.39	1.8201	0.0171	0.1628	0.852898
13	11.86	50.98	4	1.72	1.9403	0.0552	0.0045	0.850075
14	13.42	38.12	4	1.72	1.9403	0.0552	0.0045	0.850075
Ave	13.53			1.48071	1.96923	0.0185	0.0122714	0.85871
SD	1.23543			0.277806	0.0469191	0.0174914	0.0433555	0.00659355
Kinetic population #2 (0.76 < rmr0 < 0.85)
15	12.53	69.6	2	1.48	-	-	-	-
16	8.15	79.65	4	1.57	1.7825	0.0029	0.2146	0.844841
17	13.32	36.41	4	1.57	1.7825	0.0029	0.2146	0.844841
18	14.9	22.21	4	2.14	1.6843	0.0086	0.3071	0.844488
19	11.09	57.92	4	2.14	1.6843	0.0086	0.3071	0.844488
20	9.41	67.06	4	2.14	1.6843	0.0086	0.3071	0.844488
21	13.29	46.57	4	2.14	1.6843	0.0086	0.3071	0.844488
22	11.05	61.46	4	2.14	1.6843	0.0086	0.3071	0.844488
23	14.81	36.57	4	1.67	1.7262	0.0231	0.2507	0.844082
24	13.96	78.29	4	1.36	1.8471	0.0551	0.0978	0.843507
25	12.4	75.75	4	1.36	1.8471	0.0551	0.0978	0.843507
26	14.89	54.66	4	1.36	1.8471	0.0551	0.0978	0.843507
27	12.34	46.1	4	1.36	1.8471	0.0551	0.0978	0.843507
28	12.33	39.22	4	1.65	1.892	0.0554	0.0526	0.843474
29	14.88	78.76	4	1.65	1.892	0.0554	0.0526	0.843474
30	12.34	45.73	4	1.65	1.892	0.0554	0.0526	0.843474
31	14.21	74.1	4	1.65	1.892	0.0554	0.0526	0.843474
32	14.34	79.79	4	1.65	1.892	0.0554	0.0526	0.843474
33	12.27	50.29	3	1.51	1.9618	0.0382	0	0.842797
34	15.19	23.19	3	1.51	1.9618	0.0382	0	0.842797
35	12.4	23.96	3	1.51	1.9618	0.0382	0	0.842797
36	12.29	43.13	4	1.58	0.1634	0.0327	1.8039	0.841812
37	11.92	31.76	4	1.61	1.6335	0.0327	0.3338	0.841333
38	12.99	21.14	4	1.61	1.6335	0.0327	0.3338	0.841333
39	12.78	66.77	4	1.61	1.6335	0.0327	0.3338	0.841333
40	10.22	49.18	4	1.61	1.6335	0.0327	0.3338	0.841333
41	15.72	17.53	4	1.61	1.6335	0.0327	0.3338	0.841333
42	16.62	52	4	1.61	1.6335	0.0327	0.3338	0.841333
43	13.14	64.77	4	1.61	1.6335	0.0327	0.3338	0.841333
44	9.65	57.48	4	1.61	1.6335	0.0327	0.3338	0.841333
45	13.84	63.8	4	1.61	1.7479	0.0057	0.2464	0.841286
46	15.62	18.97	4	1.61	1.7479	0.0057	0.2464	0.841286
47	14.63	51.32	4	1.61	1.7479	0.0057	0.2464	0.841286
48	17.44	48.03	4	2.24	1.8272	0.0148	0.158	0.840585
49	11.88	46.18	4	2.24	1.8272	0.0148	0.158	0.840585
50	12.77	57.79	4	2.24	1.8272	0.0148	0.158	0.840585
51	14.44	18.3	4	2.24	1.8272	0.0148	0.158	0.840585
52	15.19	55.58	4	2.24	1.8272	0.0148	0.158	0.840585
53	13.81	83.33	2	1.39	-	-	-	-
54	11.05	61.7	2	1.39	-	-	-	-
55	13.07	51.91	3	1.44	1.7585	0.009	0.2325	0.837913
56	13.93	76.08	4	1.63	1.8533	0.0427	0.104	0.83319
57	10.33	67.29	4	1.63	1.8533	0.0427	0.104	0.83319
58	15.7	74.95	4	1.92	1.5817	0.0383	0.38	0.832838
59	15.26	23.18	4	1.92	1.5817	0.0383	0.38	0.832838
60	14.88	52.33	4	1.65	1.4063	0.0445	0.5492	0.831263
61	9.96	76.16	4	1.65	1.4063	0.0445	0.5492	0.831263
62	9.72	39.68	4	1.65	1.4063	0.0445	0.5492	0.831263
63	14.73	49.28	2	1.79	1.4819	0.0396	0.4785	0.831252
64	4.95	72.77	2	1.79	1.4819	0.0396	0.4785	0.831252
65	13.82	68.47	2	1.79	1.4819	0.0396	0.4785	0.831252
66	13.6	54.73	3	1.4	1.5629	0.0112	0.4259	0.831187
67	12.88	76.6	3	1.4	1.5629	0.0112	0.4259	0.831187
68	9.64	47.86	3	1.62	1.4094	0.0426	0.548	0.831173
69	17.01	30.48	3	1.62	1.4094	0.0426	0.548	0.831173
70	13.27	83.57	3	1.62	1.4094	0.0426	0.548	0.831173
71	13.14	40.6	3	1.62	1.4094	0.0426	0.548	0.831173
72	12.61	75.58	4	1.85	1.6026	0.0319	0.3655	0.830873
73	14.33	72.02	4	1.85	1.6026	0.0319	0.3655	0.830873
74	10.94	74.82	4	1.46	1.5382	0.0256	0.4362	0.829389
75	12.86	78.22	4	1.46	1.5382	0.0256	0.4362	0.829389
76	11.1	19.2	4	1.46	1.5382	0.0256	0.4362	0.829389
77	11.83	80.57	4	1.46	1.5382	0.0256	0.4362	0.829389
78	12.85	57.37	4	2.01	1.7466	0.0459	0.2075	0.828955
79	10.82	50.88	4	2.01	1.7466	0.0459	0.2075	0.828955
80	14.63	35.12	4	2.01	1.7466	0.0459	0.2075	0.828955
81	8.29	60.61	4	2.01	1.7466	0.0459	0.2075	0.828955
82	9.48	66.39	4	2.15	1.9796	0.0204	0	0.828253
83	9.79	51.43	4	2.15	1.9796	0.0204	0	0.828253
84	13.12	29.14	4	2.15	1.9796	0.0204	0	0.828253
85	12.75	67.89	4	2.15	1.9796	0.0204	0	0.828253
86	9.99	40.3	4	2.15	1.9796	0.0204	0	0.828253
87	7.99	66.55	4	2.15	1.9796	0.0204	0	0.828253
88	12.99	81.72	4	1.54	1.6701	0.0835	0.2464	0.826775
89	13.57	52.8	4	1.67	1.9254	0.0746	0	0.825815
90	4.4	76.29	4	1.67	1.9254	0.0746	0	0.825815
91	6.7	51.71	4	1.67	1.9254	0.0746	0	0.825815
92	13.84	67.72	4	1.67	1.5626	0.0399	0.3975	0.825426
93	10.45	81.48	4	1.67	1.5626	0.0399	0.3975	0.825426
94	8.81	52.13	4	1.67	1.5626	0.0399	0.3975	0.825426
95	15.49	32.91	4	1.36	1.2554	0.0056	0.739	0.825155
96	12.95	50.11	4	1.46	1.5029	0.0287	0.4684	0.823729
97	9.61	84.34	4	1.95	1.9188	0.0812	0	0.8233
98	13.88	56.25	4	1.95	1.9188	0.0812	0	0.8233
99	13.55	78.27	4	1.4	0.0789	0.0599	1.8612	0.822322
100	14.1	54.51	4	1.97	1.3857	0.0338	0.5805	0.820731
101	13.78	32.13	4	1.97	1.3857	0.0338	0.5805	0.820731
102	11.64	32.88	4	1.81	1.6488	0.1069	0.2443	0.819387
103	12.96	46.17	4	1.81	1.6488	0.1069	0.2443	0.819387
104	9.68	73.63	4	1.81	1.6488	0.1069	0.2443	0.819387
105	10.98	79.75	4	1.58	1.4779	0.0474	0.4747	0.819128
106	12.96	62.5	4	1.98	1.4037	0.0658	0.5305	0.816087
107	13.98	27.97	4	1.98	1.4037	0.0658	0.5305	0.816087
108	9.57	44.64	4	1.51	1.2255	0.022	0.7525	0.81572
109	13.89	16.27	4	1.51	1.2255	0.022	0.7525	0.81572
110	12.85	65.14	4	1.51	1.2255	0.022	0.7525	0.81572
111	14.09	41.45	4	1.51	1.2255	0.022	0.7525	0.81572
112	11	36.55	3	2.26	1.3641	0.0461	0.5898	0.813951
113	13.93	78.88	3	2.26	1.3641	0.0461	0.5898	0.813951
114	12.57	37.34	4	1.97	0.0587	0.0227	1.9186	0.813042
115	14.61	34.45	4	1.97	0.0587	0.0227	1.9186	0.813042
116	8.63	56.55	4	1.97	0.0587	0.0227	1.9186	0.813042
117	10.51	62.13	4	1.97	0.0587	0.0227	1.9186	0.813042
118	10.65	83.8	4	1.79	1.2431	0.0986	0.6583	0.812294
119	9.17	85.15	4	1.79	1.2431	0.0986	0.6583	0.812294
120	6.55	39.89	4	1.79	1.2431	0.0986	0.6583	0.812294
121	10.28	73.66	4	1.79	1.2431	0.0986	0.6583	0.812294
122	7.88	70.23	4	1.79	1.2431	0.0986	0.6583	0.812294
123	12.73	77.15	4	1.9	1.337	0.0633	0.5997	0.811734
124	9.46	51.52	4	1.9	1.337	0.0633	0.5997	0.811734
125	12.84	74.86	4	2.14	1.2982	0.0783	0.6235	0.810652
126	14.12	86.16	4	2.14	1.2982	0.0783	0.6235	0.810652
127	14.44	56.28	4	2.14	1.2982	0.0783	0.6235	0.810652
128	14.14	42.54	4	2.18	1.2747	0.0746	0.6507	0.80907
129	14.4	87.39	4	2.18	1.2747	0.0746	0.6507	0.80907
130	14.82	42	4	2.18	1.2747	0.0746	0.6507	0.80907
131	9.54	52.3	4	2.18	1.7241	0.1754	0.1005	0.808965
132	10.05	74.17	4	2.18	1.7241	0.1754	0.1005	0.808965
133	14.81	40.02	4	1.93	1.2408	0.0607	0.6985	0.808293
134	14.72	32.12	4	1.93	1.2408	0.0607	0.6985	0.808293
135	14.55	24.73	3	2.07	1.4306	0.1438	0.4256	0.80715
136	11.36	52.35	3	2.07	1.4306	0.1438	0.4256	0.80715
137	9.66	57.47	3	2.07	1.4306	0.1438	0.4256	0.80715
138	12.41	67.38	4	1.68	1.4259	0.1392	0.4349	0.802182
139	15.04	34.21	4	1.68	1.4259	0.1392	0.4349	0.802182
140	9.34	34.9	4	1.75	1.6453	0.2269	0.1278	0.798661
141	14.29	50.22	4	1.75	1.6453	0.2269	0.1278	0.798661
142	14.82	70.98	3	1.66	1.9831	0.0169	0	0.798401
143	13.62	15.26	3	1.66	1.9831	0.0169	0	0.798401
144	12.39	26.69	4	1.69	1.6354	0.1906	0.174	0.794496
145	12.36	53	4	1.69	1.6354	0.1906	0.174	0.794496
146	14.41	32.48	4	1.69	1.6354	0.1906	0.174	0.794496
147	4.09	54.1	4	1.69	1.6354	0.1906	0.174	0.794496
148	9.6	70.6	2	1.74	-	-	-	-
149	9.43	79.94	2	1.74	-	-	-	-
150	6.84	70.67	2	1.74	-	-	-	-
151	14.97	49.94	2	1.74	-	-	-	-
152	15.33	17.8	4	1.9	0.8646	0.0575	1.0779	0.788996
153	14.29	69.19	4	1.6	1.3113	0.1339	0.5548	0.788951
154	10.29	63.82	4	1.6	1.3113	0.1339	0.5548	0.788951
155	11.09	54.29	4	1.93	-	-	-	-
156	16.06	23.05	4	1.93	-	-	-	-
157	9.21	89.68	4	1.93	-	-	-	-
158	12.74	42.29	4	1.93	-	-	-	-
159	11.32	56.81	4	1.93	-	-	-	-
160	8.9	48.46	4	1.68	0.7147	0.0338	1.2515	-
161	12.63	80.99	4	1.68	0.7147	0.0338	1.2515	-
162	14.3	54.94	3	2.04	0.7681	0.1085	1.1234	0.787306
163	10.51	43.71	4	2.2	1.4661	0.2383	0.2956	0.785557
164	11.04	69.37	4	2.2	1.4661	0.2383	0.2956	0.785557
165	10.85	51.09	4	2.2	1.4661	0.2383	0.2956	0.785557
166	12.24	45.82	4	2.2	1.4661	0.2383	0.2956	0.785557
167	13.63	46.55	4	1.78	1.4507	0.1724	0.3769	0.783298
168	9.59	79.43	4	1.78	1.4507	0.1724	0.3769	0.783298
169	11.72	38.97	4	1.78	1.4507	0.1724	0.3769	0.783298
170	8.67	84.88	4	1.78	1.4507	0.1724	0.3769	0.783298
171	11.21	55	4	2.13	1.4298	0.0414	0.5288	0.782134
172	9.62	76.43	4	1.96	1.2951	0.1841	0.5208	0.780218
173	10.53	55.42	4	1.96	1.2951	0.1841	0.5208	0.780218
174	10.5	87.94	4	2.06	1.1148	0.1887	0.6965	0.776074
175	12.21	65.09	4	2.06	1.1148	0.1887	0.6965	0.776074
176	9.69	76.11	4	2.06	1.1148	0.1887	0.6965	0.776074
177	9.95	76.18	4	2.06	1.1148	0.1887	0.6965	0.776074
178	10.62	57.15	4	2.34	1.086	0.1068	0.8072	0.775875
179	8.82	83.93	4	2.34	1.086	0.1068	0.8072	0.775875
180	14.77	57.01	4	2.34	1.086	0.1068	0.8072	0.775875
181	11.35	82.34	4	2.34	1.086	0.1068	0.8072	0.775875
182	13.05	75.29	4	2.34	1.086	0.1068	0.8072	0.775875
183	9.98	42.54	4	1.72	1.6122	0.1879	0.1999	0.761402
184	10.77	32.81	4	1.72	1.6122	0.1879	0.1999	0.761402
185	11.71	39.67	4	1.72	1.6122	0.1879	0.1999	0.761402
186	10.47	40.47	4	2.11	-	-	-	-
187	9.29	80.4	4	2.11	-	-	-	-
188	11.24	53.27	4	2.34	-	-	-	-
189	14.18	28.84	4	2.34	-	-	-	-
Ave	12.0999			1.83023	1.48799	0.0729314	0.439076	0.817792
SD	2.43846			0.267356	0.390174	0.0628674	0.389034	0.0221102
Kinetic population #3 (rmr0 < 0.76)
190	10.93	51.77	4	3.44	1.1807	0.024	0.7953	0.746846
191	14.3	43.42	4	3.44	1.1807	0.024	0.7953	0.746846
192	12.65	76.63	4	1.71	0.7065	0.0405	1.253	0.744577
193	8.42	73.58	3	3.12	1.0752	0.0628	0.862	0.744003
194	12.13	74.57	4	2.56	1.0314	0.2646	0.704	0.739032
195	12.47	59.93	4	2.56	1.0314	0.2646	0.704	0.739032
196	15	84.53	4	2.56	1.0314	0.2646	0.704	0.739032
197	10.49	59.24	4	2.56	1.0314	0.2646	0.704	0.739032
198	14.21	40.54	4	2.56	1.0314	0.2646	0.704	0.739032
199	11.93	70.5	4	2.56	1.0314	0.2646	0.704	0.739032
200	10.58	77.97	4	2.56	1.0418	0.191	0.7672	0.732068
201	14.3	42.88	4	2.56	1.0418	0.191	0.7672	0.732068
202	14.76	21.1	4	2.27	1.1392	0.2746	0.5862	0.701871
Ave	12.4746			2.65077	1.04264	0.184269	0.773092	0.737113
SD	2.00159			0.462051	0.116281	0.10558	0.158861	0.0115746
Note: Dpar is the diameter of the etch figure parallel to the c axis. F, Cl and OH concentrations were caluclated from weight % oxide using the stoichiometric relationships of Ketcham (2015), and rmr0 was determined using the calculations of Carlson et al. (1999)
